# Supplementary material
Source: PubMed Central journal article supplement (PMC9536128)
Supplement: sj-pdf-1-jcb-10.1177_0271678X221105683.pdf [file sj-pdf-1-jcb-10.1177_0271678X221105683.pdf]

# **Inactivation of BACE1 increases expression of endothelial nitric oxide synthase in cerebrovascular endothelium**

Tongrong He<sup>a</sup>, Livius V d'Uscio<sup>a</sup>, Ruohan Sun<sup>a, b</sup>, Anantha Vijay R Santhanam<sup>a</sup>, Zvonimir S Katusic<sup>a, \*</sup>

<sup>a</sup> Departments of Anesthesiology and Perioperative Medicine, and Molecular Pharmacology and Experimental Therapeutics, Mayo Clinic, Rochester, MN, USA.

<sup>b</sup> Department of Neurology, the First Affiliated Hospital of Harbin Medical University, Harbin, Heilongjiang Province, 150001, China

\* Address correspondence to Zvonimir S. Katusic at Mayo Clinic, Joseph Building 4-184, 200 First Street SW. Rochester, MN 55905. Telephone: (507)255-5156, Fax: (507)255-7300. E-mail: [katusic.zvonimir@mayo.edu](mailto:katusic.zvonimir@mayo.edu).

Running headline: BACE1 and eNOS

## **Supplemental material**

### **Mice**

Male BACE<sup>-/-</sup> mice (3-5 months old) were used for assessment of body weight, arterial blood pressure, and metabolic parameters.

Female BACE1<sup>-/-</sup> mice (3-6 months old) were used to determine body weight, blood glucose, lipid profile, and eNOS protein expression in brain microvessels.

Assessment of vascular structure on basilar arteries of male eBACE1<sup>-/-</sup> mice (3-5.5 months old): Basilar artery was dissected free from surrounding tissue in cold modified Krebs-Ringer bicarbonate solution under a microscope. Internal and external diameters of basilar arteries were recorded under ex-vivo conditions with transmural pressure of 30 mmHg, using a video dimension analyzer system (Living Systems Instrumentation, Burlington, VT). Medial thickness was calculated by subtraction of the internal diameter from the external diameter and divided by two (2).

### **Western blot antibodies**

Mouse anti-catalase (cat# C0979, dilution 1:250) and mouse anti-nitrotyrosine (clone 1A6, cat# 05-233, dilution 1:250) were purchased from Sigma-Aldrich (St. Louis, MO). Rabbit anti-CuZn superoxide dismutase (CuZnSOD, cat# ADI-SOD-100-F, dilution 1:500), and rabbit anti-manganese superoxide dismutase (MnSOD, cat# ADI-SOD-110-F, dilution 1:500) were purchased from Enzo Life Sciences (Farmingdale, NY).

### **Detection of intracellular levels of superoxide anion**

Intracellular superoxide anions were quantified using a high-performance liquid chromatography/fluorescence assay that uses dihydroethidium as a probe, as described in previous study with modifications (1). Briefly, after cells were treated with BACE1siRNA or CtsiRNA for 2 days, cells in culture dishes were incubated with dihydroethidium (10 μM) in phenol red-free EBM2 at 37 °C for 15 min. The culture dishes were then washed to remove the free probe and cells were incubated with phenol red-free EBM2 for 1 hour at 37°C. After dishes were washed with PBS, 300 μl 100% chilled methanol was added to the dishes. Cells were harvested and homogenized by sonication for 5 second, 3 times. After centrifugation at 12,000rpm for 10 min, the supernatant was collected and analyzed by high-performance liquid chromatography/fluorescence (Beckman Coulter) in 37.0% acetonitrile in 0.1% trifluoroacetic acid aqueous solution. Data were quantified using 2-hydroxyethidium standard from the reaction between dihydroethidium and Fremy salt as described and normalized against cell protein levels.

### **Acute treatment with A $\beta$ 1-40 and A $\beta$ 1-42**

Human A $\beta$ 1-40 peptides or human A $\beta$ 1-42 peptides (Anaspec, Inc, Fremont CA) were reconstituted with 1.0% NH<sub>4</sub>OH (1mg/70  $\mu$ l), then further diluted with PBS, according to the manufacturer's protocol. Reconstituted peptides were aliquoted and stored at -20<sup>o</sup>C, according to manufacturer's recommendation. Human BMECs were treated with A $\beta$ 1-40 or A $\beta$ 1-42 (10<sup>-12</sup>, 10<sup>-9</sup>, or 10<sup>-5</sup> M) for 24 hours, the cells were collected for Western blot.

### **References:**

1. d'Uscio LV, Smith LA, Katusic ZS. Erythropoietin increases expression and function of vascular copper- and zinc-containing superoxide dismutase. *Hypertension*. 2010 Apr;55(4):998-1004.
2. d'Uscio LV, He T, Santhanam AV, et al. Endothelium-specific amyloid precursor protein deficiency causes endothelial dysfunction in cerebral arteries. *J Cereb Blood Flow Metab* 2018; 38: 1715-1726.

## Supplemental Figure 1

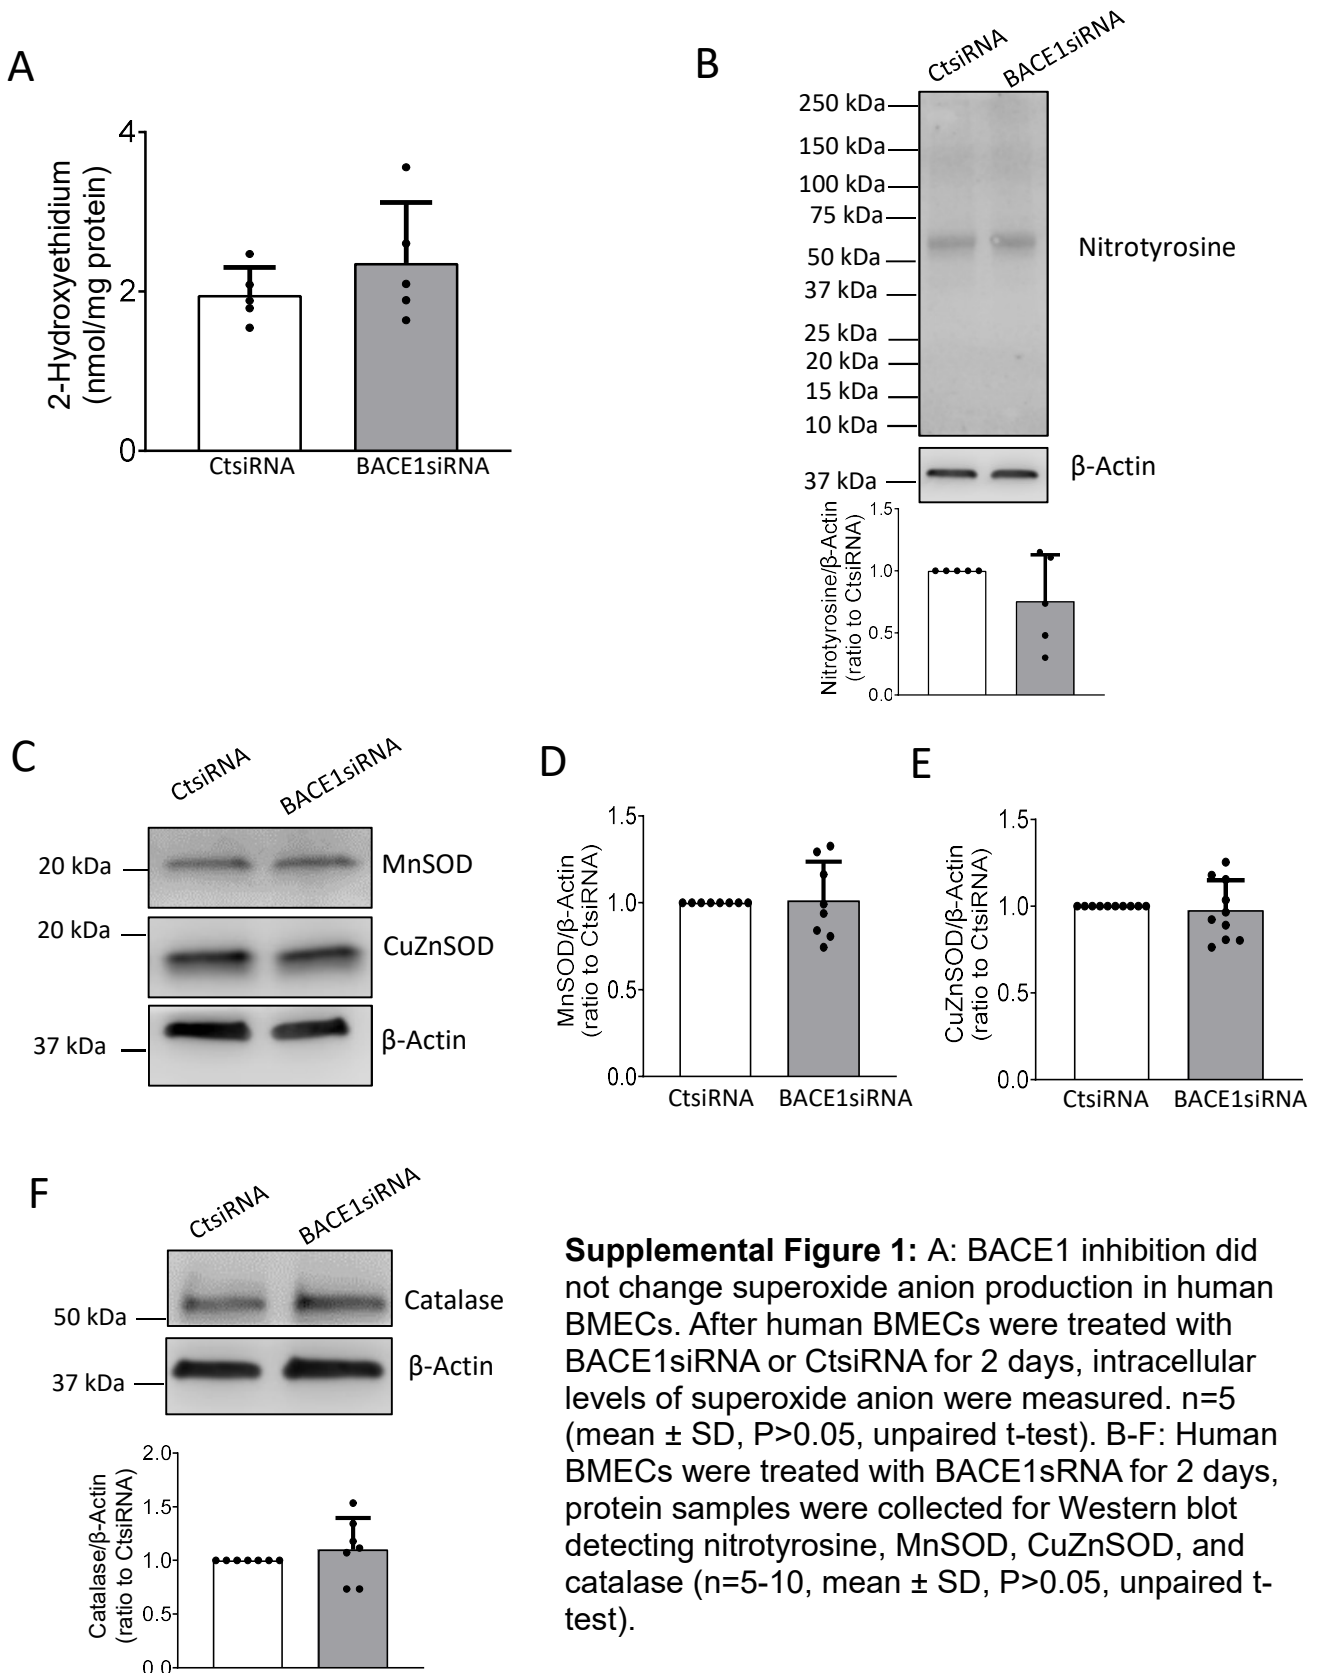

**Supplemental Figure 1:** A: BACE1 inhibition did not change superoxide anion production in human BMECs. After human BMECs were treated with BACE1siRNA or CtsiRNA for 2 days, intracellular levels of superoxide anion were measured.  $n=5$  (mean  $\pm$  SD,  $P>0.05$ , unpaired t-test). B-F: Human BMECs were treated with BACE1siRNA for 2 days, protein samples were collected for Western blot detecting nitrotyrosine, MnSOD, CuZnSOD, and catalase ( $n=5-10$ , mean  $\pm$  SD,  $P>0.05$ , unpaired t-test).

## Supplemental Figure 2

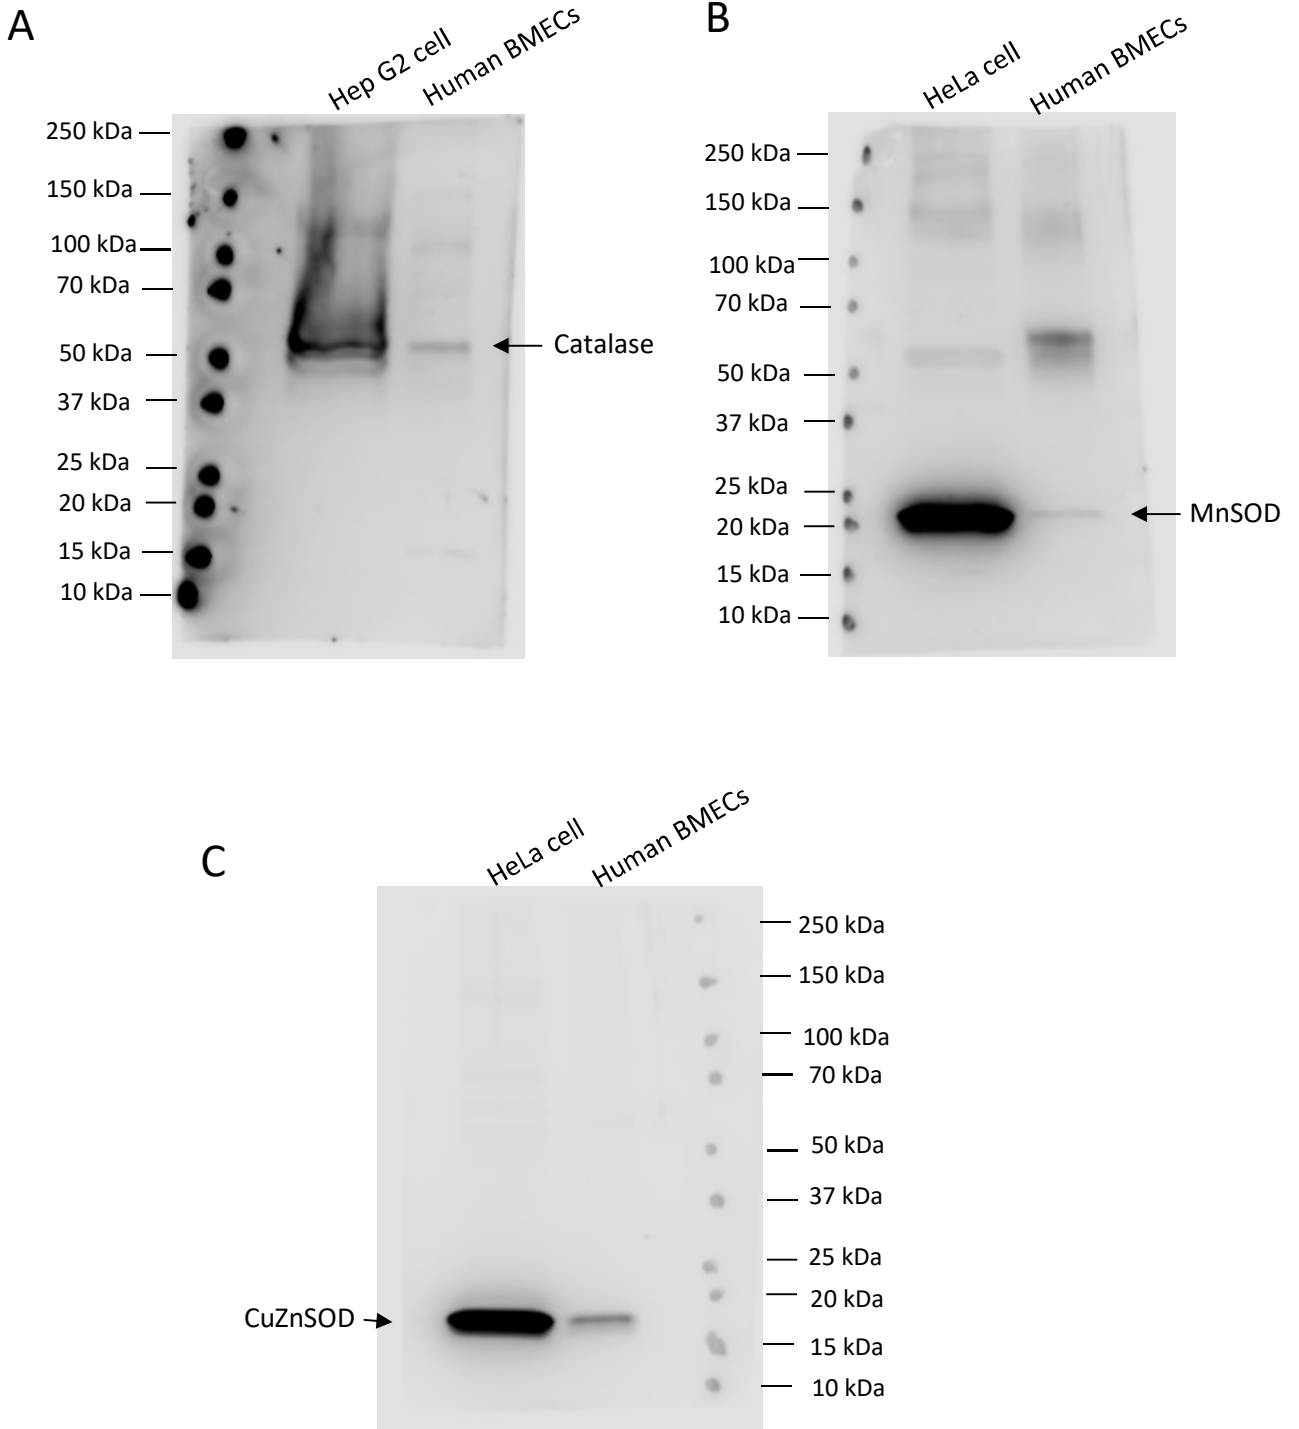

**Supplemental Figure 2:** Verification of antibodies. Positive controls for antibodies were used according to recommendations by manufacturers from which antibodies were purchased.

### Supplemental Figure 3

A

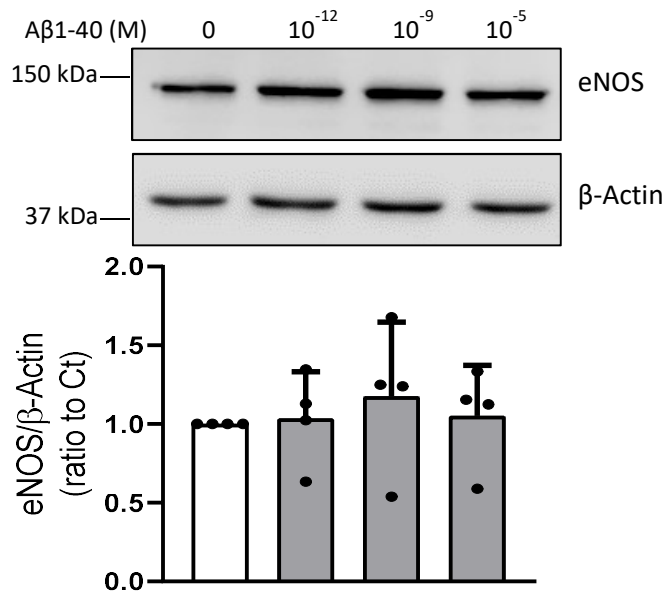

B

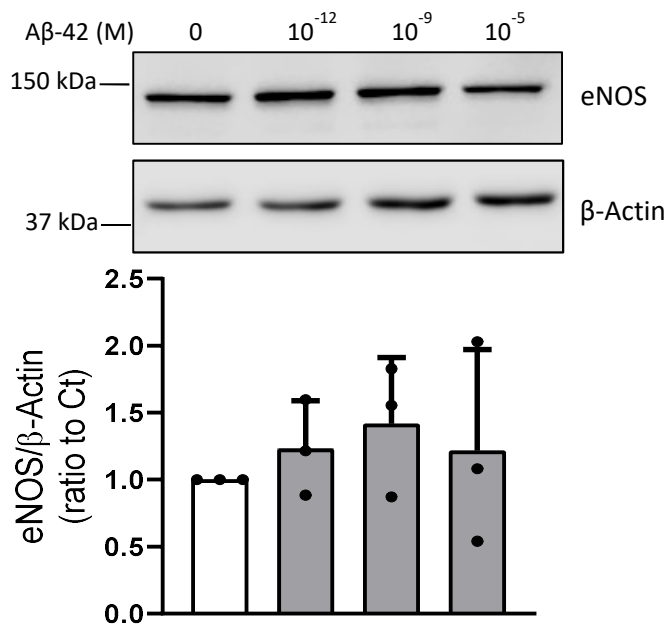

**Supplemental Figure 3:** A $\beta$  peptides did not change eNOS expression in human BMECs. Cells were treated with A $\beta$ 1-40 or A $\beta$ 1-42 for 24 hours. Data are presented as mean  $\pm$  SD,  $P > 0.05$ ;  $n = 3-4$ . For non-parametric data analysis of multiple groups, Kruskal-Wallis test was used.  $P < 0.05$  was considered statistically significant.

**Supplemental Table 1.** Characteristics of male wild-type littermates and BACE1<sup>-/-</sup> mice.

| <b>Parameters</b>    | <b>WT</b>   | <b>BACE1<sup>-/-</sup></b> |
|----------------------|-------------|----------------------------|
| Body weight (g)      | 31±3 (15)   | 26±3 (15) *                |
| SBP (mmHg)           | 116±5 (9)   | 109±9 (9)                  |
| MBP (mmHg)           | 89±5 (9)    | 85±7 (9)                   |
| DBP (mmHg)           | 76±6 (9)    | 73±6 (9)                   |
| Glucose (mg/dL)      | 166±35 (11) | 177±23 (11)                |
| Cholesterol (mg/dL)  | 59±15 (9)   | 69±10 (9)                  |
| HDL (mg/dL)          | 47±13 (9)   | 56±8 (9)                   |
| Triglyceride (mg/dL) | 88±43 (9)   | 112±41 (9)                 |
| Aβ1-40 (pg/mL)       | 136±62 (17) | 46±32 (17) *               |

SBP indicates systolic blood pressure; MBP, mean blood pressure; DBP, diastolic blood pressure; HDL, high-density lipoprotein; Aβ, amyloid-β; WT, wild-type. Data are mean ± SD and the numbers of mice are indicated in the parentheses. \* P<0.05 vs. wild-type (WT) littermates (unpaired t-test).

**Supplemental Table 2.** Characteristics of female wild-type littermates and BACE1<sup>-/-</sup> mice.

| <b>Parameters</b>    | <b>WT</b>  | <b>BACE1<sup>-/-</sup></b> |
|----------------------|------------|----------------------------|
| Body weight (g)      | 25±2 (6)   | 22±2 (6) *                 |
| Glucose (mg/dL)      | 177±15 (6) | 157±20 (5)                 |
| Cholesterol (mg/dL)  | 51±7 (5)   | 44±13 (5)                  |
| HDL (mg/dL)          | 38±7 (5)   | 33±11 (5)                  |
| Triglyceride (mg/dL) | 67±19 (5)  | 85±22 (5)                  |

HDL indicates high-density lipoprotein; WT, wild-type. Data are means ± SD and the numbers of mice are indicated in the parentheses. \* P<0.05 vs. wild-type (WT) littermates (unpaired t-test).



**Supplemental Figure 4**

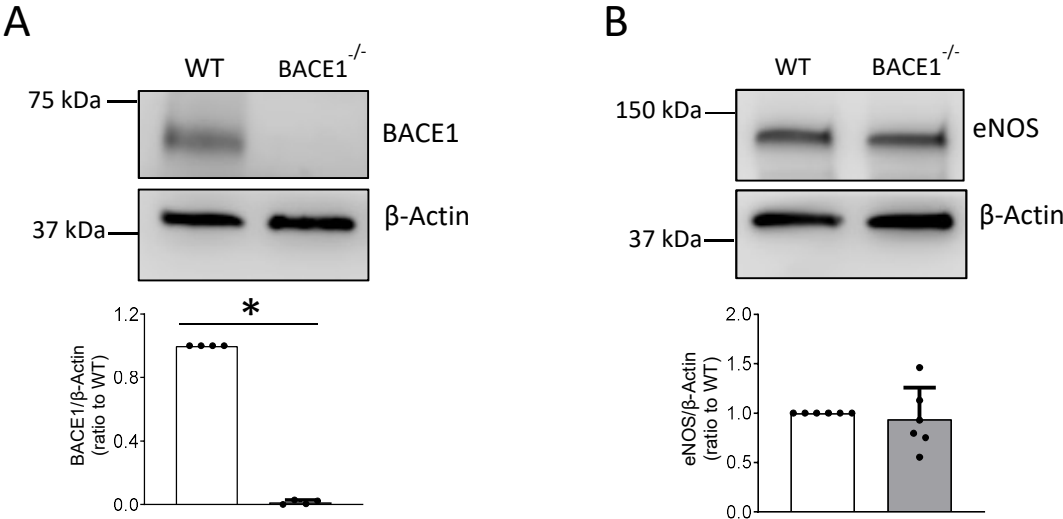

**Supplemental Figure 4:** Expressions of eNOS was not affected in brain microvessels of female  $BACE1^{-/-}$  mice. A: BACE1 expression was abolished in cerebral microvessels (n=4, \*P<0.05). B: Microvascular protein levels of eNOS were not significantly changed (n=6).

Supplemental Figure 5

A

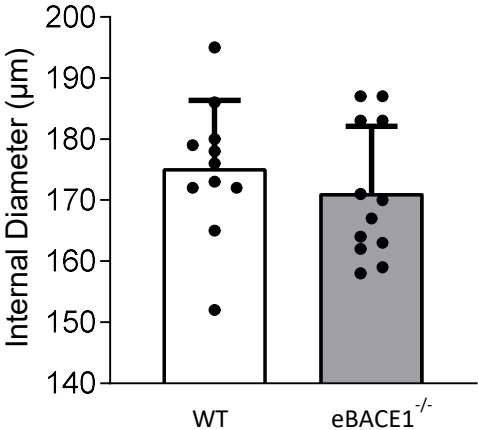

B

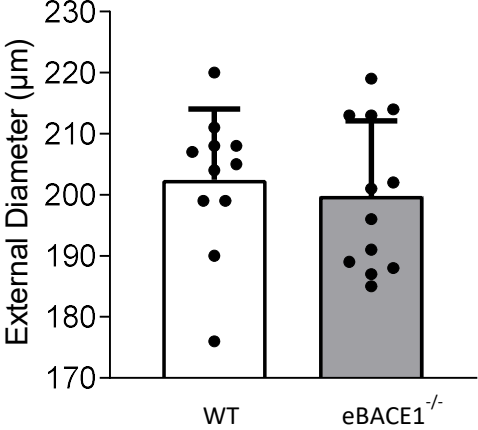

C

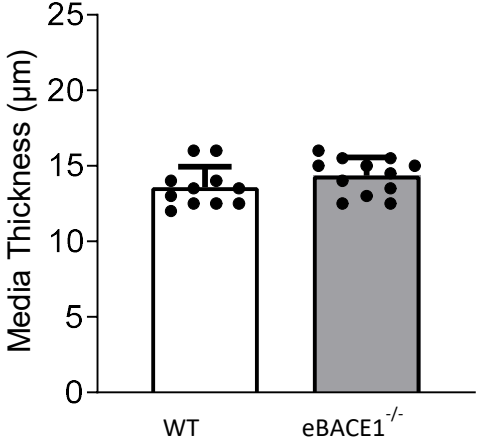

**Supplemental Figure 5:** Vascular structure of basilar arteries were not significantly different between male eBACE1<sup>-/-</sup> mice and WT mice. n=11-12 (mean ± SD, P>0.05, unpaired t-test).
